# Supplementary material
Source: Springer Nature journal article supplement (https://www.springermedizin.de/resource/supplementary/13023_2012_486_MOESM1_ESM.pdf/9642684)
Supplement: MOESM1 [file 9642684]

**Supplementary data table S-1: Genes Implicated in Systemic Lupus Erythematosus.**

| Symbol            | Chromosome | SLE                         | LN       | Caucasians           | African American    | Asian      | Hispanic | CNV                      | epigenetics | miRNA |
|-------------------|------------|-----------------------------|----------|----------------------|---------------------|------------|----------|--------------------------|-------------|-------|
| ATG5              | 6          | YES [1][2]                  |          | YES [1][3]           |                     | YES [4]    |          |                          |             |       |
| ACTN4             | 19         | YES [5]                     |          | YES [5]              |                     |            |          |                          |             |       |
| BANK1             | 4          | YES [6]                     |          | YES [6]              |                     |            |          |                          |             |       |
| BLK               | 8          | YES [1][7][8]               |          | YES [7]<br>[1][8][3] |                     | YES [4][9] |          |                          |             |       |
| C1QA              | 1          | YES<br>[10][11][12]         | YES [13] |                      |                     |            |          |                          |             |       |
| C1QB              | 1          | YES<br>[10][11][12]         | YES [13] |                      |                     |            |          |                          |             |       |
| C2                | 6          | YES<br>[10][11][12]         |          |                      |                     |            |          |                          |             |       |
| C4A               | 6          | YES<br>[10][11][12]<br>[14] |          | YES [14]             |                     |            |          | YES [14]<br>(caucasians) |             |       |
| C4B               | 6          | YES<br>[10][11][12]<br>[14] |          | YES [14]             |                     |            |          | YES [14]<br>(caucasians) |             |       |
| ATF6B<br>(CREBL1) | 6          | YES [15]                    |          |                      |                     |            |          |                          |             |       |
| CRP               | 1          | YES [16]                    |          | YES<br>[17][18][19]  | YES<br>[17][18][19] |            |          |                          |             |       |
| CD44              | 11         | YES [5]                     |          | YES [5]              |                     |            |          |                          |             |       |
| DNAJA1            | 9          | YES [5]                     |          | YES [5]              |                     |            |          |                          |             |       |

|                   |      |               |                                     |               |          |               |             |                        |  |                    |
|-------------------|------|---------------|-------------------------------------|---------------|----------|---------------|-------------|------------------------|--|--------------------|
| ETS1              | 11   |               |                                     |               |          | YES [4]'[9]   |             |                        |  |                    |
| FCGR1A            | 1    | YES [16]      |                                     |               |          |               |             |                        |  |                    |
| FCGR1B            | 1    | YES [16]      |                                     |               |          |               |             |                        |  |                    |
| FCGR2A            | 1    | YES [16]      | YES [20]                            | YES [1]       |          |               |             |                        |  |                    |
| FCGR2B            | 1    | YES [16]      |                                     |               |          |               |             |                        |  |                    |
| FCGR3A            | 1    | YES [21]      | YES [22]'[20]                       |               | YES [23] |               | YES LN [22] |                        |  |                    |
| FCGR3B            | 1    | YES [21]'[24] | YES<br>glomerulo-<br>nephritis [25] |               |          | YES [22]'[26] |             | YES [25]'<br>[27]'[28] |  |                    |
| FRK-PTPRD<br>pair | 6; 9 | YES [5]       |                                     | YES [5]       |          |               |             |                        |  |                    |
| HLA-DRB1          |      | YES [15]      |                                     | YES [3]'[15]  |          | YES [4]' [9]  |             |                        |  |                    |
| HLA-DRB2          | 6    | YES [29]      | NO [30]'[31]                        | YES [29]      | NO [29]  | YES [4]'[9]   |             |                        |  |                    |
| HLA-DRB3          | 6    | YES [29]      | NO [30]'[31]                        | YES [29]' [7] | NO [29]  | YES [4]'[9]   |             |                        |  |                    |
| ICA1              | 7    | [1]           |                                     |               |          |               |             |                        |  |                    |
| IKZF1             | 7    |               |                                     | YES [3]       |          | YES [4]'      |             |                        |  |                    |
| IL10              | 1    |               |                                     | YES [1]' [3]  |          |               |             |                        |  |                    |
| IL21              | 4    | YES [32]      |                                     | YES [32]      | YES [32] |               |             |                        |  |                    |
| IRAK1<br>(MECP2)  | X    | YES [33]      |                                     | YES [3]       |          |               |             |                        |  | YES mir146<br>[34] |
| IRF5              | 7    | YES [35, 36]  |                                     | YES [1]' [3]  |          | YES [4]'[9]   |             |                        |  | YES mir146<br>[34] |

|                        |    |                  |                      |                         |          |            |  |  |  |  |
|------------------------|----|------------------|----------------------|-------------------------|----------|------------|--|--|--|--|
| IRF53 (not determined) |    |                  |                      | YES [7] [8]             |          |            |  |  |  |  |
| IRF8                   | 16 | YES [5]          |                      | YES [5]                 |          |            |  |  |  |  |
| ITGAM                  | 16 | YES [1][7][37]   |                      | YES [38] [7] [1] [8][3] | YES [38] | NO [38]    |  |  |  |  |
| JAZF1                  | 7  |                  |                      | YES [1][3]              |          |            |  |  |  |  |
| KPNA1                  | 3  | YES [5]          |                      | YES [5]                 |          |            |  |  |  |  |
| LRRC18 (WDFY4)         |    |                  |                      |                         |          | YES [4][9] |  |  |  |  |
| Lyn                    |    |                  |                      | YES [1]                 |          |            |  |  |  |  |
| MECP2                  | X  | YES [39][40][41] |                      |                         |          |            |  |  |  |  |
| MICB                   | 6  | YES [15]         |                      | YES [15]                |          |            |  |  |  |  |
| NMNAT2                 | 1  | YES [1]          |                      |                         |          |            |  |  |  |  |
| NOTCH4                 | 6  | YES [42]         |                      |                         |          |            |  |  |  |  |
| OR2H2                  | 6  | YES [15]         |                      | YES [15]                |          |            |  |  |  |  |
| PDCD1                  | 2  | YES [43]         | YES [44][45][46][47] |                         |          |            |  |  |  |  |



|              |    |                     |          |                            |  |              |  |  |  |                 |
|--------------|----|---------------------|----------|----------------------------|--|--------------|--|--|--|-----------------|
| STAT4        | 2  | YES [53]            | YES [54] | YES [7]' YES [1]' [8]' [3] |  | YES [4]' [9] |  |  |  |                 |
| SYK          | 9  | YES [5]             |          | YES [5]                    |  |              |  |  |  |                 |
| TAP2         | 6  | YES [55]            |          |                            |  |              |  |  |  |                 |
| TNFAIP3      | 6  | YES [8]             |          | YES [8]' [3]               |  | YES [4]' [9] |  |  |  |                 |
| TNFSF4       | 1  | YES [56]' [57]      |          | YES [3]                    |  | YES [4]'     |  |  |  |                 |
| TNIP1        | 5  |                     |          | YES [1]' [3]               |  | YES [4]'     |  |  |  |                 |
| TRAF6        | 11 |                     |          |                            |  |              |  |  |  | YES mir146 [34] |
| TREX1        | 3  | YES [58]            |          |                            |  |              |  |  |  |                 |
| TRIM27       | 6  | YES [15]            |          | YES [15]                   |  |              |  |  |  |                 |
| TRIM31       | 6  | YES [42]            |          |                            |  |              |  |  |  |                 |
| TYK2         | 19 | YES [35]' [39]' [3] |          |                            |  |              |  |  |  |                 |
| UBE2L3 (HIC) | 22 | YES [1]' [2]' [5]   |          | YES [1]' [3]               |  | YES [4]      |  |  |  |                 |
| UHRF1BP1     | 6  |                     |          | YES [1]' [3]               |  |              |  |  |  |                 |
| XKR6         |    |                     |          | YES [1]                    |  |              |  |  |  |                 |

## **References**

1. Harley JB, Alarcon-Riquelme ME, Criswell LA, et al. Genome-wide association scan in women with systemic lupus erythematosus identifies susceptibility variants in ITGAM, PTK, KIAA1542 and other loci. *Nat Genet* 2008;40(2):204-10.
2. Graham RR, Hom G, Ortmann W, Behrens TW. Review of recent genome-wide association scans in lupus. *J Intern Med* 2009;265(6):680-8.
3. Gateva V, Sandling JK, Hom G, et al. A large-scale replication study identifies TNIP1, PRDM1, JAZF1, UHRF1BP1 and IL10 as risk loci for systemic lupus erythematosus. *Nat Genet* 2009;41(11):1228-33.
4. Han JW, Zheng HF, Cui Y, et al. Genome-wide association study in a Chinese Han population identifies nine new susceptibility loci for systemic lupus erythematosus. *Nat Genet* 2009;41(11):1234-7.
5. Ramos PS, Williams AH, Ziegler JT, et al. Genetic analyses of interferon pathway-related genes reveals multiple new loci associated with systemic lupus erythematosus (SLE). *Arthritis Rheum* 2011.
6. Kozyrev SV, Abelson AK, Wojcik J, et al. Functional variants in the B-cell gene BANK1 are associated with systemic lupus erythematosus. *Nat Genet* 2008;40(2):211-6.
7. Hom G, Graham RR, Modrek B, et al. Association of systemic lupus erythematosus with C8orf13-BLK and ITGAM-ITGAX. *N Engl J Med* 2008;358(9):900-9.
8. Graham RR, Cotsapas C, Davies L, et al. Genetic variants near TNFAIP3 on 6q23 are associated with systemic lupus erythematosus. *Nat Genet* 2008;40(9):1059-61.
9. Yang W, Shen N, Ye DQ, et al. Genome-wide association study in Asian populations identifies variants in ETS1 and WDFY4 associated with systemic lupus erythematosus. *PLoS Genet* 2010;6(2):e1000841.
10. Agnello V, De Bracco MM, Kunkel HG. Hereditary C2 deficiency with some manifestations of systemic lupus erythematosus. *J Immunol* 1972;108(3):837-40.
11. Hauptmann G, Grosshans E, Heid E. Lupus erythematosus syndrome and complete deficiency of the fourth component of complement. *Boll Ist Sieroter Milan* 1974;53(1):suppl:228.
12. Nishino H, Shibuya K, Nishida Y, Mushimoto M. Lupus erythematosus-like syndrome with selective complete deficiency of C1q. *Ann Intern Med* 1981;95(3):322-4.
13. Pickering MC, Botto M, Taylor PR, Lachmann PJ, Walport MJ. Systemic lupus erythematosus, complement deficiency, and apoptosis. *Adv Immunol* 2000;76:227-324.

14. Yang Y, Chung EK, Wu YL, et al. Gene copy-number variation and associated polymorphisms of complement component C4 in human systemic lupus erythematosus (SLE): low copy number is a risk factor for and high copy number is a protective factor against SLE susceptibility in European Americans. *Am J Hum Genet* 2007;80(6):1037-54.
15. Barcellos LF, May SL, Ramsay PP, et al. High-density SNP screening of the major histocompatibility complex in systemic lupus erythematosus demonstrates strong evidence for independent susceptibility regions. *PLoS Genet* 2009;5(10):e1000696.
16. Brown EE, Edberg JC, Kimberly RP. Fc receptor genes and the systemic lupus erythematosus diathesis. *Autoimmunity* 2007;40(8):567-81.
17. Edberg JC, Wu J, Langefeld CD, et al. Genetic variation in the CRP promoter: association with systemic lupus erythematosus. *Hum Mol Genet* 2008;17(8):1147-55.
18. Jonsen A, Gunnarsson I, Gullstrand B, et al. Association between SLE nephritis and polymorphic variants of the CRP and FcgammaRIIIa genes. *Rheumatology (Oxford)* 2007;46(9):1417-21.
19. Russell AI, Cunninghame Graham DS, Shepherd C, et al. Polymorphism at the C-reactive protein locus influences gene expression and predisposes to systemic lupus erythematosus. *Hum Mol Genet* 2004;13(1):137-47.
20. Karassa FB, Trikalinos TA, Ioannidis JP. The Fc gamma RIIIA-F158 allele is a risk factor for the development of lupus nephritis: a meta-analysis. *Kidney Int* 2003;63(4):1475-82.
21. Wu J, Edberg JC, Redecha PB, et al. A novel polymorphism of FcgammaRIIIa (CD16) alters receptor function and predisposes to autoimmune disease. *J Clin Invest* 1997;100(5):1059-70.
22. Kyogoku C, Dijstelbloem HM, Tsuchiya N, et al. Fcgamma receptor gene polymorphisms in Japanese patients with systemic lupus erythematosus: contribution of FCGR2B to genetic susceptibility. *Arthritis Rheum* 2002;46(5):1242-54.
23. Salmon JE, Millard S, Schachter LA, et al. Fc gamma RIIA alleles are heritable risk factors for lupus nephritis in African Americans. *J Clin Invest* 1996;97(5):1348-54.
24. Ptacek T, Li X, Kelley JM, Edberg JC. Copy number variants in genetic susceptibility and severity of systemic lupus erythematosus. *Cytogenet Genome Res* 2008;123(1-4):142-7.
25. Aitman TJ, Dong R, Vyse TJ, et al. Copy number polymorphism in Fcgr3 predisposes to glomerulonephritis in rats and humans. *Nature* 2006;439(7078):851-5.
26. Lee YH, Ji JD, Song GG. Fcgamma receptor IIB and IIIB polymorphisms and susceptibility to systemic lupus erythematosus and lupus nephritis: a meta-analysis. *Lupus* 2009;18(8):727-34.
27. Fanciulli M, Norsworthy PJ, Petretto E, et al. FCGR3B copy number variation is associated with susceptibility to systemic, but not organ-specific, autoimmunity. *Nat Genet* 2007;39(6):721-3.
28. Willcocks LC, Lyons PA, Clatworthy MR, et al. Copy number of FCGR3B, which is associated with systemic lupus erythematosus, correlates with protein expression and immune complex uptake. *J Exp Med* 2008;205(7):1573-82.

29. Tsao BP, Wu H. The genetics of human lupus. In: Wallace DJ, Hahn BH, editors. *Dubois' lupus erythematosus*. Philadelphia: Lippincott Williams & Wilkins; 2007. p. 54-81.
30. Freedman BI, Spray BJ, Heise ER, Espeland MA, Canzanello VJ. A race-controlled human leukocyte antigen frequency analysis in lupus nephritis. The South-Eastern Organ Procurement Foundation. *Am J Kidney Dis* 1993;21(4):378-82.
31. Harley JB, Sestak AL, Willis LG, Fu SM, Hansen JA, Reichlin M. A model for disease heterogeneity in systemic lupus erythematosus. Relationships between histocompatibility antigens, autoantibodies, and lymphopenia or renal disease. *Arthritis Rheum* 1989;32(7):826-36.
32. Hughes T, Kim-Howard X, Kelly JA, et al. Fine-mapping and transethnic genotyping establish IL2/IL21 genetic association with lupus and localize this genetic effect to IL21. *Arthritis Rheum* 2011;63(6):1689-97.
33. Jacob CO, Reiff A, Armstrong DL, et al. Identification of novel susceptibility genes in childhood-onset systemic lupus erythematosus using a uniquely designed candidate gene pathway platform. *Arthritis Rheum* 2007;56(12):4164-73.
34. Tang Y, Luo X, Cui H, et al. MicroRNA-146A contributes to abnormal activation of the type I interferon pathway in human lupus by targeting the key signaling proteins. *Arthritis Rheum* 2009;60(4):1065-75.
35. Sigurdsson S, Nordmark G, Goring HH, et al. Polymorphisms in the tyrosine kinase 2 and interferon regulatory factor 5 genes are associated with systemic lupus erythematosus. *Am J Hum Genet* 2005;76(3):528-37.
36. Kozyrev SV, Alarcon-Riquelme ME. The genetics and biology of Irf5-mediated signaling in lupus. *Autoimmunity* 2007;40(8):591-601.
37. Nath SK, Han S, Kim-Howard X, et al. A nonsynonymous functional variant in integrin-alpha(M) (encoded by ITGAM) is associated with systemic lupus erythematosus. *Nat Genet* 2008;40(2):152-4.
38. Han S, Kim-Howard X, Deshmukh H, et al. Evaluation of imputation-based association in and around the integrin-alpha-M (ITGAM) gene and replication of robust association between a non-synonymous functional variant within ITGAM and systemic lupus erythematosus (SLE). *Hum Mol Genet* 2009;18(6):1171-80.
39. Suarez-Gestal M, Calaza M, Endreffy E, et al. Replication of recently identified systemic lupus erythematosus genetic associations: a case-control study. *Arthritis Res Ther* 2009;11(3):R69.
40. Sawalha AH, Webb R, Han S, et al. Common variants within MECP2 confer risk of systemic lupus erythematosus. *PLoS One* 2008;3(3):e1727.
41. Webb R, Wren JD, Jeffries M, et al. Variants within MECP2, a key transcription regulator, are associated with increased susceptibility to lupus and differential gene expression in patients with systemic lupus erythematosus. *Arthritis Rheum* 2009;60(4):1076-84.
42. Rioux JD, Goyette P, Vyse TJ, et al. Mapping of multiple susceptibility variants within the MHC region for 7 immune-mediated diseases. *Proc Natl Acad Sci U S A* 2009;106(44):18680-5.
43. Prokunina L, Castillejo-Lopez C, Oberg F, et al. A regulatory polymorphism in PDCD1 is associated with susceptibility to systemic lupus erythematosus in humans. *Nat Genet* 2002;32(4):666-9.
44. Johansson M, Arlestig L, Moller B, Rantapaa-Dahlqvist S. Association of a PDCD1 polymorphism with renal manifestations in systemic lupus erythematosus. *Arthritis Rheum* 2005;52(6):1665-9.



45. Nielsen C, Lastrup H, Voss A, Junker P, Husby S, Lillevang ST. A putative regulatory polymorphism in PD-1 is associated with nephropathy in a population-based cohort of systemic lupus erythematosus patients. *Lupus* 2004;13(7):510-6.
46. Prokunina L, Gunnarsson I, Sturfelt G, et al. The systemic lupus erythematosus-associated PDCD1 polymorphism PD1.3A in lupus nephritis. *Arthritis Rheum* 2004;50(1):327-8.
47. Lee YH, Woo JH, Choi SJ, Ji JD, Song GG. Association of programmed cell death 1 polymorphisms and systemic lupus erythematosus: a meta-analysis. *Lupus* 2009;18(1):9-15.
48. Tan W, Sunahori K, Zhao J, et al. Association of PPP2CA polymorphisms with SLE susceptibility in multiple ethnic groups. *Arthritis Rheum* 2011.
49. Kyogoku C, Langefeld CD, Ortmann WA, et al. Genetic association of the R620W polymorphism of protein tyrosine phosphatase PTPN22 with human SLE. *Am J Hum Genet* 2004;75(3):504-7.
50. Wu H, Cantor RM, Graham DS, et al. Association analysis of the R620W polymorphism of protein tyrosine phosphatase PTPN22 in systemic lupus erythematosus families: increased T allele frequency in systemic lupus erythematosus patients with autoimmune thyroid disease. *Arthritis Rheum* 2005;52(8):2396-402.
51. Fernando MM, Stevens CR, Sabeti PC, et al. Identification of two independent risk factors for lupus within the MHC in United Kingdom families. *PLoS Genet* 2007;3(11):e192.
52. Moser KL, Kelly JA, Lessard CJ, Harley JB. Recent insights into the genetic basis of systemic lupus erythematosus. *Genes Immun* 2009;10(5):373-9.
53. Remmers EF, Plenge RM, Lee AT, et al. STAT4 and the risk of rheumatoid arthritis and systemic lupus erythematosus. *N Engl J Med* 2007;357(10):977-86.
54. Taylor KE, Remmers EF, Lee AT, et al. Specificity of the STAT4 genetic association for severe disease manifestations of systemic lupus erythematosus. *PLoS Genet* 2008;4(5):e1000084.
55. Ramos PS, Langefeld CD, Bera LA, Gaffney PM, Noble JA, Moser KL. Variation in the ATP-binding cassette transporter 2 gene is a separate risk factor for systemic lupus erythematosus within the MHC. *Genes Immun* 2009;10(4):350-5.
56. Cunninghame Graham DS, Graham RR, Manku H, et al. Polymorphism at the TNF superfamily gene TNFSF4 confers susceptibility to systemic lupus erythematosus. *Nat Genet* 2008;40(1):83-9.
57. Delgado-Vega AM, Abelson AK, Sanchez E, et al. Replication of the TNFSF4 (OX40L) promoter region association with systemic lupus erythematosus. *Genes Immun* 2009;10(3):248-53.
58. Lee-Kirsch MA, Gong M, Chowdhury D, et al. Mutations in the gene encoding the 3'-5' DNA exonuclease TREX1 are associated with systemic lupus erythematosus. *Nat Genet* 2007;39(9):1065-7.
